# Supplementary material for: Natural amino acids/H2O as a metal- and halide-free catalyst system for the synthesis of propylene carbonate from propylene oxide and CO2under moderate conditions
Source: Royal Society of Chemistry journal article supplement (doi:10.1039/c4ra06964a), 2014-01-01
Supplement: c4ra06964a1.pdf [file c4ra06964a1.pdf]

## Supplementary Information

### **Natural amino acids/H<sub>2</sub>O as metal- and halide-free catalyst system for the synthesis of propylene carbonate from propylene oxide and CO<sub>2</sub> under moderate conditions**

Jose Tharun, Roshith Roshan, Amal Cherian Kathalikkattil, Kang Dong Heon, Ryu Hyun Mo and  
Dae-Won Park\*

*Division of Chemical and Biomolecular Engineering, Pusan National University, Busan 609-  
735, Korea*

\* Corresponding author. Tel.: +82 51 510 2399; fax: +82 51 512 8563.

*E-mail address:* [dwpark@pusan.ac.kr](mailto:dwpark@pusan.ac.kr)

Table S1. Coupling of PO with CO<sub>2</sub> catalyzed by various  $\alpha$ -amino acids

| Entry | Amino acids     | Yield (%)              |                        |
|-------|-----------------|------------------------|------------------------|
|       |                 | <sup>a</sup> Reference | <sup>b</sup> Reference |
| 1     | glycine         | 86                     | 20                     |
| 2     | L-alanine       | 50                     | 19                     |
| 3     | L-leucine       | 100                    | 63                     |
| 4     | L-isoleucine    | 95                     | 62                     |
| 5     | L-valine        | 94                     | 40                     |
| 6     | L-proline       | 100                    | 51                     |
| 7     | L-phenylalanine | 100                    | 67                     |
| 8     | L-tryptophan    | 82                     | 27                     |
| 9     | L-methionine    | 100                    | 45                     |
| 10    | L-asparagine    | 88                     | 7                      |
| 11    | L-glutamine     | 73                     | 5                      |
| 12    | L-cysteine      | 89                     | 10                     |
| 13    | L-serine        | 94                     | 14                     |
| 14    | L-threonine     | 41                     | 36                     |
| 15    | L-tyrosine      | 82                     | 44                     |
| 16    | L-aspartic acid | 67                     | 18                     |
| 17    | L-glutamic acid | 29                     | 15                     |
| 18    | L-arginine      | 88                     | 44                     |
| 19    | L-histidine     | 100                    | 100                    |
| 20    | L-lysine        | 100                    | 78                     |

Reaction conditions: PO = 20 mmol, temperature = 130 °C, time = 48 h <sup>a</sup>catalyst amount = 0.6 mol%, CH<sub>2</sub>Cl<sub>2</sub> = 1 mL, CO<sub>2</sub> pressure = 6 MPa <sup>b</sup>catalyst amount = 0.8 mol%, CO<sub>2</sub> pressure = 8 MPa
